# Supplementary material for: Signatures of disease outcome severity in the intestinal fungal and bacterial microbiome of COVID-19 patients
Source: PubMed Central journal article supplement (PMC10952111; doi:10.3389/fcimb.2024.1352202), 2024-03-06

A

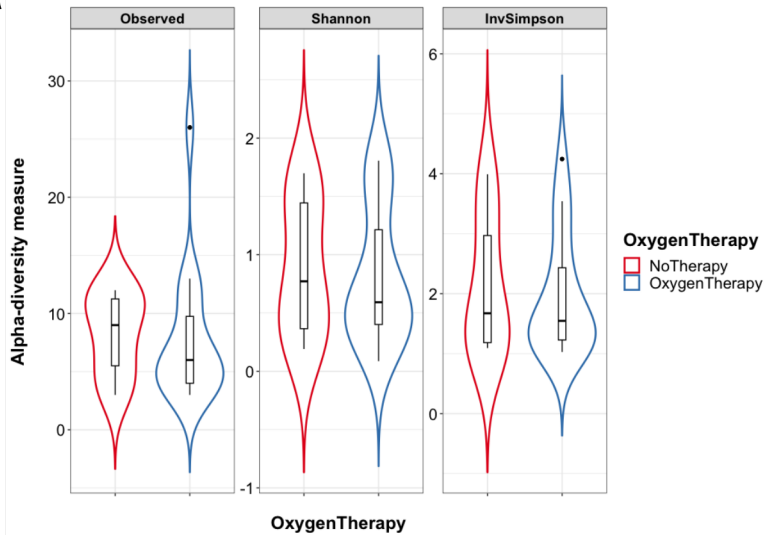

B

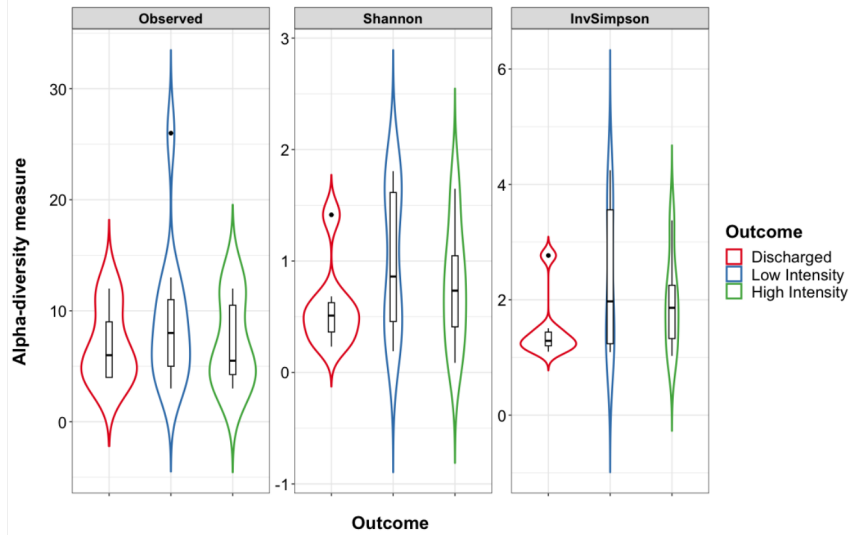

Supplement: Image_1.pdf [file Image_1.pdf]
